# Supplementary material
Source: HighWire-hosted journal article supplement (https://bmjopen.bmj.com/content/12/2/e049388)
Supplement: inline-supplementary-material-1 [file inline-supplementary-material-1.pdf]

## Supplementary Tables

Supplementary Table 1. Socio-demographic characteristics of the study participants by payment type.

| Variable              | Publicly funded, n=112 | Self-paid, n=237 | p-value | Unknown, n=97 |
|-----------------------|------------------------|------------------|---------|---------------|
| Age (years), mean±SD  | 34.2±4.8               | 34.2±5.9         | 0.99    | 32.1±5.7      |
| BMI, n(%)             |                        |                  |         |               |
| Underweight           | 12 (10.8%)             | 32 (13.9%)       | 0.62    | 0 (0%)        |
| Normal                | 69 (62.2%)             | 132 (57.1%)      |         | 44 (74.6%)    |
| Overweight/Obese      | 30 (27.0%)             | 67 (29.0%)       |         | 15 (25.4%)    |
| Education level, n(%) |                        |                  |         |               |
| ISCED 4               | 39 (34.8%)             | 47 (20.0%)       | <0.01   | 34 (35.1%)    |
| ISCED 5               | 27 (24.1%)             | 90 (38.3%)       |         | 7 (7.2%)      |
| ISCED 6               | 46 (41.1%)             | 98 (41.7%)       |         | 57.7%)        |
| Location, n(%)        |                        |                  |         |               |
| Aktobe                | 41 (36.6%)             | 26 (11.0%)       | <0.001  | 0 (0%)        |
| Almaty                | 3 (2.7%)               | 96 (40.5%)       |         | 0 (0%)        |
| Nur-Sultan            | 68 (60.7%)             | 115 (48.5%)      |         | 0 (0%)        |
| Shymkent              | 0 (0%)                 | 0 (0%)           |         | 97 (100%)     |

Supplementary Table 2. Past and current medical history of infertility of the study participants by payment type.

| Variable                                                     | Publicly funded, n=112 | Self-paid, n=237 | p-value | Unknown, n=97 |
|--------------------------------------------------------------|------------------------|------------------|---------|---------------|
| Comorbidity, n(%)                                            |                        |                  |         |               |
| Yes                                                          | 49 (43.7%)             | 125 (52.7%)      | 0.12    | 0 (0%)        |
| No                                                           | 63 (56.3%)             | 112 (47.3%)      |         | 97 (100%)     |
| Infertility duration (years)                                 |                        |                  |         |               |
| Mean±SD                                                      | 6.6±3.6                | 5.1±3.9          | <0.01   | 7.0±3.9       |
| Median (IQR)                                                 | 6 (4-8)                | 4 (3-7)          |         | 6 (4-9.5)     |
| Number of previous deliveries, n(%)                          |                        |                  |         |               |
| None                                                         | 87 (77.7%)             | 150 (63.5%)      | <0.01   | 61 (63.5%)    |
| One                                                          | 24 (21.4%)             | 62 (26.3%)       |         | 26 (27.1%)    |
| Two or more                                                  | 1 (0.9%)               | 24 (10.2%)       |         | 9 (9.4%)      |
| Number of previous miscarriages, n(%)                        |                        |                  |         |               |
| None                                                         | 100 (89.3%)            | 205 (86.9%)      | 0.52    | 79 (82.3%)    |
| One or more                                                  | 12 (10.7%)             | 31 (13.1%)       |         | 17 (17.7%)    |
| Number of previous intentional pregnancy interruptions, n(%) |                        |                  |         |               |
| None                                                         | 101 (90.2%)            | 209 (88.6%)      | 0.65    | 94 (97.9%)    |
| One or more                                                  | 11 (9.8%)              | 27 (11.4%)       |         | 2 (2.1%)      |
| Number of previous IVF cycles, n(%)                          |                        |                  |         |               |
| None                                                         | 84 (75.7%)             | 184 (78.6%)      | 0.03    | 67 (69.1%)    |
| One                                                          | 20 (18.0%)             | 22 (9.4%)        |         | 25 (25.8%)    |
| 2 or more                                                    | 7 (6.3%)               | 28 (12.0%)       |         | 5 (5.1%)      |
| Cause of infertility, n(%)                                   |                        |                  |         |               |
| Female                                                       | 35 (31.2%)             | 106 (45.3%)      | <0.01   | 77 (80.2%)    |
| Male                                                         | 6 (5.4%)               | 22 (9.4%)        |         | 13 (13.5%)    |
| Mixed                                                        | 71 (63.4%)             | 106 (45.3%)      |         | 6 (6.3%)      |

Supplementary Table 3. IVF treatment characteristics of the study participants by payment type.

| Variable                                 | Publicly funded, n=112 | Self-paid, n=237 | p-value | Unknown, n=97 |
|------------------------------------------|------------------------|------------------|---------|---------------|
| Number of oocytes retrieved              |                        |                  |         |               |
| Mean±SD                                  | 10.2±8.0               | 10.3±8.1         | 0.87    | 11.2±8.8      |
| Median (IQR)                             | 9 (4-14)               | 9 (4-14)         |         | 9 (4-14)      |
| Number of embryos transferred            |                        |                  |         |               |
| Mean±SD                                  | 1.6±1.0                | 1.5±0.8          | 0.93    | 4.5±4.8       |
| Median (IQR)                             | 2 (1-2)                | 2 (1-2)          |         | 2 (1-6)       |
| Used protocol, n(%)                      |                        |                  |         |               |
| Classic-long                             | 7 (6.6%)               | 28 (12.0%)       | 0.09    | 1 (1.0%)      |
| Classic-short                            | 94 (89.5%)             | 189 (80.8%)      |         | 96 (99.0%)    |
| Non-classic – natural cycle              | 2 (1.9%)               | 5 (2.1%)         |         | 0 (0%)        |
| Non-classic – ultrashort                 | 1 (1.0%)               | 12 (5.1%)        |         | 0 (0%)        |
| Non-classic – stimulated in luteal phase | 1 (1.0%)               | 0 (0%)           |         | 0 (0%)        |
| Clinical pregnancy, n (%)                |                        |                  |         |               |
| Yes                                      | 51 (53.1%)             | 146 (65.2%)      | 0.04    | 19 (70.4%)    |
| No                                       | 45 (46.9%)             | 78 (34.8%)       |         | 8 (29.6%)     |
| Miscarriage, n(%)                        |                        |                  |         |               |
| Yes                                      | 0 (0%)                 | 1 (0.4%)         | 1.00    | 0 (0%)        |
| No                                       | 102 (100%)             | 225 (99.6%)      |         | 24 (100%)     |
| Multiple pregnancies, n(%)               |                        |                  |         |               |
| Yes                                      | 1 (1.0%)               | 3 (1.3%)         | 1.00    | 0 (0%)        |
| No                                       | 103 (99.0%)            | 226 (98.7%)      |         | 89 (100%)     |

Supplementary Table 4. Socio-demographic characteristics of the study participants by IVF clinical pregnancy status.

| Variable              | Pregnant, n=216 | Not pregnant, n=131 | p-value | Unknown, n=99 |
|-----------------------|-----------------|---------------------|---------|---------------|
| Age (years), mean±SD  | 33.7±5.9        | 34.5±5.2            | 0.21    | 33.0          |
| BMI, n(%)             |                 |                     |         |               |
| Underweight           | 38 (18.2%)      | 4 (3.2%)            | <0.001  | 2 (3.0%)      |
| Normal                | 130 (62.2%)     | 74 (58.7%)          |         | 41 (62.1%)    |
| Overweight/Obese      | 41 (19.6%)      | 48 (38.1%)          |         | 23 (34.9%)    |
| Education level, n(%) |                 |                     |         |               |
| ISCED 4               | 49 (38.0%)      | 40 (18.5%)          | <0.001  | 31 (31.3%)    |
| ISCED 5               | 30 (23.3%)      | 81 (37.5%)          |         | 13 (13.1%)    |
| ISCED 6               | 50 (38.7%)      | 95 (44.0%)          |         | 55 (55.6%)    |
| Location, n(%)        |                 |                     |         |               |
| Aktobe                | 31 (23.7%)      | 26 (12.0%)          | 0.02    | 10 (10.1%)    |
| Almaty                | 38 (29.0%)      | 59 (27.3%)          |         | 2 (2.0%)      |
| Nur-Sultan            | 54 (41.2%)      | 112 (51.9%)         |         | 17 (17.2%)    |
| Shymkent              | 8 (6.1%)        | 19 (8.8%)           |         | 70 (70.7%)    |
| Type of payment, n(%) |                 |                     |         |               |
| State-funded          | 51 (25.9%)      | 45 (36.6%)          | 0.04    | 16 (55.2%)    |
| Self-paid             | 146 (74.1%)     | 78 (63.4%)          |         | 13 (44.8%)    |

Supplementary Table 5. Past and current medical history of infertility of the study participants by IVF clinical pregnancy status.

| Variable                                                     | Pregnant,<br>n=216 | Not pregnant,<br>n=131 | p-value | Unknown,<br>n=99 |
|--------------------------------------------------------------|--------------------|------------------------|---------|------------------|
| Comorbidity, n(%)                                            |                    |                        |         |                  |
| Yes                                                          | 76 (35.2%)         | 80 (61.1%)             | <0.001  | 18 (18.2%)       |
| No                                                           | 140 (64.8%)        | 51 (38.9%)             |         | 81 (81.8%)       |
| Infertility duration (years)                                 |                    |                        |         |                  |
| Mean±SD                                                      | 5.4±3.7            | 6.1±4.0                | 0.13    | 6.7±3.9          |
| Median (IQR)                                                 | 4.8 (3-7)          | 5 (3-8)                |         | 6.5 (4-9)        |
| Number of previous deliveries, n(%)                          |                    |                        |         |                  |
| None                                                         | 144 (66.7%)        | 90 (69.2%)             | 0.29    | 64 (65.3%)       |
| One                                                          | 50 (23.1%)         | 33 (25.4%)             |         | 29 (29.6%)       |
| Two or more                                                  | 22 (10.2%)         | 7 (5.4%)               |         | 5 (5.1%)         |
| Number of previous miscarriages, n(%)                        |                    |                        |         |                  |
| None                                                         | 190 (88.0%)        | 111 (85.4%)            | 0.49    | 83 (84.7%)       |
| One or more                                                  | 26 (12.0%)         | 19 (14.6%)             |         | 15 (15.3%)       |
| Number of previous intentional pregnancy interruptions, n(%) |                    |                        |         |                  |
| None                                                         | 198 (91.7%)        | 116 (89.2%)            | 0.45    | 90 (91.8%)       |
| One or more                                                  | 18 (8.3%)          | 14 (10.8%)             |         | 8 (8.2%)         |
| Number of previous IVF cycles, n(%)                          |                    |                        |         |                  |
| None                                                         | 179 (83.4%)        | 90 (68.7%)             | <0.01   | 66 (68.7%)       |
| One                                                          | 18 (8.4%)          | 26 (19.8%)             |         | 23 (24.0%)       |
| 2 or more                                                    | 18 (8.4%)          | 15 (11.5%)             |         | 7 (7.3%)         |
| Cause of infertility, n(%)                                   |                    |                        |         |                  |
| Female                                                       | 97 (45.1%)         | 55 (42.3%)             | 0.32    | 66 (68.0%)       |
| Male                                                         | 16 (7.4%)          | 16 (12.3%)             |         | 9 (9.3%)         |
| Mixed                                                        | 102 (47.4%)        | 59 (45.4%)             |         | 22 (22.7%)       |

Supplementary Table 6. IVF treatment characteristics of the study participants by IVF clinical pregnancy status.

| Variable                                 | Pregnant, n=216 | Not pregnant, n=131 | p-value | Unknown, n=99 |
|------------------------------------------|-----------------|---------------------|---------|---------------|
| Number of oocytes retrieved              |                 |                     |         |               |
| Mean±SD                                  | 11.2±7.8        | 8.5±7.9             | <0.01   | 11.6±9.4      |
| Median (IQR)                             | 10 (6-14)       | 7 (2-13)            |         | 6 (4-17)      |
| Number of embryos transferred            |                 |                     |         |               |
| Mean±SD                                  | 1.7±0.8         | 1.7±1.9             | 0.10    | 4.7±4.9       |
| Median (IQR)                             | 2 (1-2)         | 1 (1-2)             |         | 2 (1-6.5)     |
| Used protocol, n(%)                      |                 |                     |         |               |
| Classic-long                             | 23 (10.7%)      | 11 (8.4%)           | 0.27    | 2 (2.2%)      |
| Classic-short                            | 177 (82.3%)     | 114 (87.0%)         |         | 88 (97.8%)    |
| Non-classic – natural cycle              | 4 (1.9%)        | 3 (2.3%)            |         | 0 (0%)        |
| Non-classic – ultrashort                 | 11 (5.1%)       | 2 (1.5%)            |         | 0 (0%)        |
| Non-classic – stimulated in luteal phase | 0 (0%)          | 1 (0.8%)            |         | 0 (0%)        |

Supplementary Table 7. Simple and multiple Poisson regression analyses of clinical setting and payment type predicting IVF clinical pregnancy (sensitivity analysis, excluding women from Astana private clinic (n=108) with the highest pregnancy rate).

| Scales          | Clinical pregnancy    |                       |
|-----------------|-----------------------|-----------------------|
|                 | Crude RR<br>(95% CI)  | &Adjusted RR (95% CI) |
|                 |                       | <b>Model A</b>        |
| Public clinics  | 0.47 (0.32; 0.70)*    | 0.54 (0.39; 0.75)*    |
|                 |                       | <b>Model B</b>        |
| Public clinics  | 0.47 (0.32; 0.70)*    | 0.43 (0.27; 0.69)*    |
| Publicly funded | 0.80 (0.51; 1.25)     | 1.44 (0.90; 2.32)     |
|                 |                       | <b>Model C</b>        |
|                 | &Adjusted RR (95% CI) |                       |
|                 | Publicly funded       | Self-paid             |
| Public clinics  | 0.87 (0.32; 2.34)     | 0.34 (0.19; 0.63)     |

& Each of the models was adjusted for age, BMI, education, comorbidity, cause of infertility, infertility duration, number of previous IVF cycles, number of embryos transferred, and number of oocytes retrieved.

\*p<0.05
